# Supplementary material for: Organic solvent- and catalyst-free Baeyer–Villiger oxidation of levoglucosenone and dihydrolevoglucosenone (Cyrene®): a sustainable route to (S)-γ-hydroxymethyl-α,β-butenolide and (S)-γ-hydroxymethyl-γ-butyrolactone
Source: Royal Society of Chemistry journal article supplement (doi:10.1039/c8gc00553b), 2018-01-01
Supplement: c8gc00553b1.pdf [file c8gc00553b1.pdf]

**Organic solvent- and catalyst-free Baeyer Villiger oxidation  
of levoglucosenone and dihydrolevoglucosenone (Cyrene®): a  
sustainable route to (S)- $\gamma$ -hydroxymethyl- $\alpha,\beta$ -butenolide and  
(S)- $\gamma$ -hydroxymethyl- $\gamma$ -butyrolactone**

**G. Bonneau,<sup>a</sup> A. A. M. Peru,<sup>a</sup> A. L. Flourat<sup>a</sup> and F. Allais<sup>\*a</sup>**

<sup>a</sup> *AgroParisTech, Chaire Agro-Biotechnologies Industrielles (ABI), CEBB, 3 rue des Rouges Terres F-51110  
Pomacle, France.*

*Prof. Florent Allais, [florent.allais@agroparistech.fr](mailto:florent.allais@agroparistech.fr)*

**Electronic Supplementary Information (ESI)**

# Table of content

|                                                                                                         |     |
|---------------------------------------------------------------------------------------------------------|-----|
| General organic solvent- and catalyst-free Baeyer Villiger oxidation procedure for HBO                  | S2  |
| Optimized kilo-scale organic solvent- and catalyst-free Baeyer Villiger oxidation procedure for HBO     | S3  |
| Analytical data for HBO                                                                                 | S3  |
| HPLC method for HBO production monitoring                                                               | S4  |
| Palladium-catalyzed hydrogenation of LGO into 2H-LGO                                                    | S4  |
| Palladium-catalyzed hydrogenation of HBO into 2H-HBO                                                    | S5  |
| Optimized kilo-scale organic solvent- and catalyst-free Baeyer Villiger oxidation procedure for 2H-HBO  | S6  |
| Analytical data for 2H-HBO                                                                              | S6  |
| <sup>1</sup> H NMR spectrum of industrial grade levoglucosenone (LGO)                                   | S8  |
| <sup>13</sup> C NMR spectrum of industrial grade levoglucosenone (LGO)                                  | S9  |
| FT-IR spectrum of ( <i>S</i> )- $\gamma$ -hydroxymethyl- $\alpha,\beta$ -butenolide (HBO)               | S10 |
| <sup>1</sup> H NMR spectrum of ( <i>S</i> )- $\gamma$ -hydroxymethyl- $\alpha,\beta$ -butenolide (HBO)  | S11 |
| <sup>13</sup> C NMR spectrum of ( <i>S</i> )- $\gamma$ -hydroxymethyl- $\alpha,\beta$ -butenolide (HBO) | S12 |
| FT-IR spectrum of 2,3-dehydro levoglucosenone (2H-LGO)                                                  | S13 |
| <sup>1</sup> H NMR spectrum of 2,3-dehydro levoglucosenone (2H-LGO)                                     | S14 |
| <sup>13</sup> C NMR spectrum of 2,3-dehydro levoglucosenone (2H-LGO)                                    | S15 |
| FT-IR spectrum of ( <i>S</i> )- $\gamma$ -hydroxymethyl- $\gamma$ -butyrolactone (2H-HBO)               | S16 |
| <sup>1</sup> H NMR spectrum of ( <i>S</i> )- $\gamma$ -hydroxymethyl- $\gamma$ -butyrolactone (2H-HBO)  | S17 |
| <sup>13</sup> C NMR spectrum of ( <i>S</i> )- $\gamma$ -hydroxymethyl- $\gamma$ -butyrolactone (2H-HBO) | S18 |

## General organic solvent- and catalyst-free Baeyer Villiger oxidation procedure for HBO

An 30% aq. H<sub>2</sub>O<sub>2</sub> solution (9.78 M, 0.81 L, 7.92 mol, 1 eq./**LGO**) was added dropwise over 3.5 hours under nitrogen to **LGO** (1 kg, 7.93 mol) cooled down with an ice bath. After completion of the addition, the reaction was warmed to 50 °C and stirred for an extra 20 hours. Presence of H<sub>2</sub>O<sub>2</sub> was evaluated with peroxide strips and, if any, the residual H<sub>2</sub>O<sub>2</sub> was quenched using the methods described in the manuscript. The reaction mixture was then concentrated in vacuo and the residue was distilled of (150 °C/0.7-0.9 mbar) to provide **HBO** as a clear oil that readily cristallizes (71% yield).

## Optimized kilo-scale organic solvent- and catalyst-free Baeyer Villiger oxidation procedure for HBO

An 30% aq. H<sub>2</sub>O<sub>2</sub> solution (9.78 M, 0.81 L, 7.93 mol, 1 eq./**LGO**) was added dropwise over 4 hours under nitrogen to a solution of **LGO** (1 kg, 7.93 mol) in water (1 L) cooled down with an ice bath. After completion of the addition, the reaction was warmed to 50 °C and stirred for an extra 6 hours. Presence of H<sub>2</sub>O<sub>2</sub> was evaluated with peroxide strips and, if any, the residual H<sub>2</sub>O<sub>2</sub> was quenched using the methods described in the manuscript. The reaction mixture was then concentrated in vacuo and the residue was distilled of (150 °C/0.7-0.9 mbar) to provide **HBO** as a clear oil that readily cristallizes (71% yield).

## Analytical data for HBO

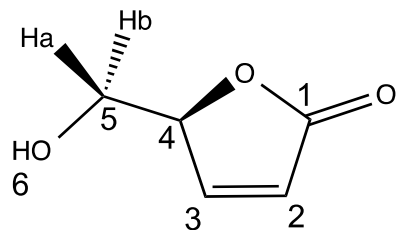

$R_f$  = 0.24 (20/80 cyclohexane/ethyl acetate), light brown spot

FT-IR (neat, cm<sup>-1</sup>): 3423 (OH), 1728 (C=O), 1329, 1162, 1050

UV (EtOH, nm): 221

$[\alpha]_{\text{D}}^{20}$  -112.0 (*c* 0.01, CHCl<sub>3</sub>). [(Lit. -114.5 (*c* 0.1, CHCl<sub>3</sub>)]

<sup>1</sup>H NMR (CDCl<sub>3</sub>, 300 MHz):  $\delta_{\text{H}}$  3.25 (s, 1H, H<sub>6</sub>), 3.79 (dd, 1H, *J* = 12 and 3.6 Hz, H<sub>5a</sub>), 3.99 (d, 1H, *J* = 12 Hz, H<sub>5b</sub>), 5.17 (m, 1H, H<sub>4</sub>), 6.20 (dd, 1H, *J* = 5.7 and 1.8 Hz, H<sub>2</sub>), 7.53 (dd, 1H, *J* = 5.7 and 1.5 Hz, H<sub>3</sub>).

<sup>13</sup>C NMR (CDCl<sub>3</sub>, 75 MHz):  $\delta_{\text{C}}$  62.2 (t, C<sub>1</sub>), 84.3 (d, C<sub>4</sub>), 122.8 (d, C<sub>2</sub>), 154.0 (d, C<sub>3</sub>), 173.5 (s, C<sub>1</sub>)

HRMS: *m/z* [M+H]<sup>+</sup> calcd for C<sub>5</sub>H<sub>6</sub>O<sub>3</sub>: 115.0395, found: 115.0396

## HPLC method for HBO production monitoring

HPLC analyses were performed on a Thermofisher Ultimate 3000 equipped with a DAD detector (220 nm) and a Thermoscientific Synchronis aQ (250 x 4.6 mm, 5 $\mu$ m) column. Samples were prepared by diluting 10  $\mu$ L of reaction mixture in 1.5 mL of acetonitrile. Following conditions were applied: injection 10  $\mu$ L, oven temperature 30 °C, flow 0.8 mL/min, elution method (water/acetonitrile): 0-5 min isocratic 85/15, 5-10 min from 85/15 to 90/10, 10-15 min isocratic 90/10, 15-20 min 90/10 to 85/15. Retention times: *t<sub>r</sub>*(LGO) = 7.91 min, *t<sub>r</sub>*(HBO) = 3.66 min, *t<sub>r</sub>*(FBO) = 6.23 min.

## Palladium-catalyzed hydrogenation of LGO into 2H-LGO

10% Pd/C (10% w/w, 500 mg) was added to a solution of (-)-Levoglucosenone **LGO** (5 g, 39.7 mmol) in ethyl acetate (50 mL, C = 0.8 M) at rt. The stirred suspension was degassed 3 times and put under nitrogen. The suspension was then hydrogenated under hydrogen atmosphere at rt until TLC showed complete consumption of starting material. The crude mixture was filtered over a pad of Celite® and the filtrate was

concentrated to dryness with silica gel. The crude product was purified by silica gel chromatography (elution with 10 to 60% ethyl acetate in cyclohexane) to yield pure **2H-LGO** (colorless oil, 4.4 g, 87%)

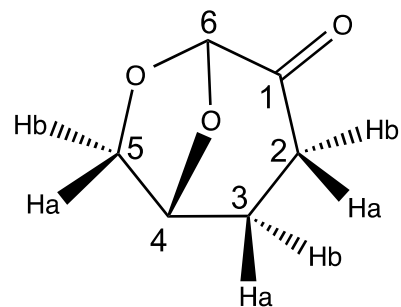

$R_f = 0.64$  (20/80 cyclohexane/ethyl acetate), violet spot

FT-IR (neat,  $\text{cm}^{-1}$ ): 2965, 1739 (C=O), 1418, 1285, 1108

UV (EtOH, nm): 308, 211

$[\alpha]_D^{20} -253.6$  ( $c$  0.01,  $\text{CHCl}_3$ )

$^1\text{H}$  NMR ( $\text{CDCl}_3$ , 300 MHz):  $\delta_{\text{H}}$  2.02 (m, 1H,  $\text{H}_{3\text{b}}$ ), 2.34 (m, 2H,  $\text{H}_{2\text{b},3\text{a}}$ ), 2.62 (m, 1H,  $\text{H}_{2\text{a}}$ ), 4.00 (m, 2H,  $\text{H}_{5\text{a},4}$ ), 4.70 (m, 1H,  $\text{H}_{5\text{b}}$ ), 5.10 (s, 1H,  $\text{H}_6$ ).

$^{13}\text{C}$  NMR ( $\text{CDCl}_3$ , 75 MHz):  $\delta_{\text{C}}$  29.9 (t,  $\text{C}_3$ ), 31.1 (t,  $\text{C}_2$ ), 67.5 (t,  $\text{C}_5$ ), 73.1 (d,  $\text{C}_4$ ), 101.5 (d,  $\text{C}_6$ ), 200.3 (s,  $\text{C}_1$ ).

HRMS:  $m/z$   $[\text{M}+\text{H}]^+$  calcd for  $\text{C}_6\text{H}_9\text{O}_3$ : 129.0552, found: 129.0553

## Palladium-catalyzed hydrogenation of HBO into 2H-HBO

10% Pd/C (10% w/w, 250 mg) was added to a solution of **HBO** (1.4 g, 12.3 mmol) in ethyl acetate (15 mL,  $C = 0.8$  M) at rt. The stirred suspension was degassed 3 times and put under nitrogen. The suspension was then hydrogenated under hydrogen atmosphere at rt until TLC showed complete consumption of starting material. The crude mixture was filtered over a pad of Celite® and the filtrate was concentrated to

dryness with silica gel. The crude product was purified by silica gel chromatography (elution with 100% ethyl acetate) to yield pure **2H-HBO** (1.26 g, 87%).

### Optimized kilo-scale organic solvent- and catalyst-free Baeyer Villiger oxidation procedure for 2H-HBO

An 30% aq. H<sub>2</sub>O<sub>2</sub> solution (9.78 M, 0.81 L, 7.92 mol, 1 eq./**2H-LGO**) was added dropwise over 4 hours under nitrogen to a solution of **2H-LGO** (844 g, 7.93 mol) in water (1L) cooled down with an ice bath. After completion of the addition, the reaction was warmed to 50 °C and stirred for an extra 6 hours. Presence of H<sub>2</sub>O<sub>2</sub> was evaluated with peroxide strips and, if any, the residual H<sub>2</sub>O<sub>2</sub> was quenched using the methods described in the manuscript. The reaction mixture was then concentrated in vacuo and the residue was distilled of (150 °C/0.7-0.9 mbar) to provide **2H-HBO** as a clear oil that readily cristallizes (72% yield).

### Analytical data for 2H-HBO

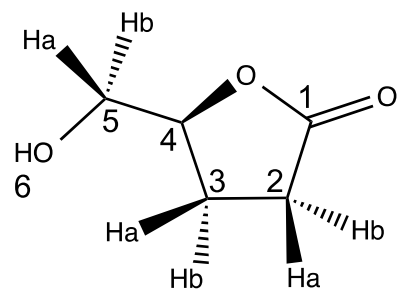

$R_f$  = 0.27 (20/80 cyclohexane/ethyl acetate), black spot

FT-IR (neat, cm<sup>-1</sup>): 3420 (OH), 2938, 1752 (C=O), 1353, 1181

UV (EtOH, nm): 207

$[\alpha]_D^{20}$  +52.9 ( $c$  0.01, CHCl<sub>3</sub>). [(Lit.<sup>24</sup> +55.2 ( $c$  0.1, CHCl<sub>3</sub>)]

<sup>1</sup>H NMR (CDCl<sub>3</sub>, 300 MHz):  $\delta_H$  2.20 (m, 2H, H<sub>3</sub>), 2.61 (m, 3H, H<sub>2,6</sub>), 3.66 (dd, 1H,  $J$  = 12.6 and 4.5 Hz, H<sub>5a</sub>), 3.92 (dd, 1H,  $J$  = 12.6 and 2.7 Hz, H<sub>5b</sub>), 4.64 (m, 1H, H<sub>4</sub>)

$^{13}\text{C}$  NMR ( $\text{CDCl}_3$ , 75 MHz):  $\delta_{\text{C}}$  23.1 (t,  $\text{C}_2$ ), 28.7 (t,  $\text{C}_3$ ), 64.1 (t,  $\text{C}_5$ ), 80.8 (d,  $\text{C}_4$ ), 177.7 (s,  $\text{C}_1$ )

HRMS:  $m/z$   $[\text{M}+\text{Na}]^+$  calcd for  $\text{C}_5\text{H}_8\text{NaO}_3$ : 139.0371, found: 139.0379

# <sup>1</sup>H NMR spectrum of industrial grade levoglucosenone (LG0)

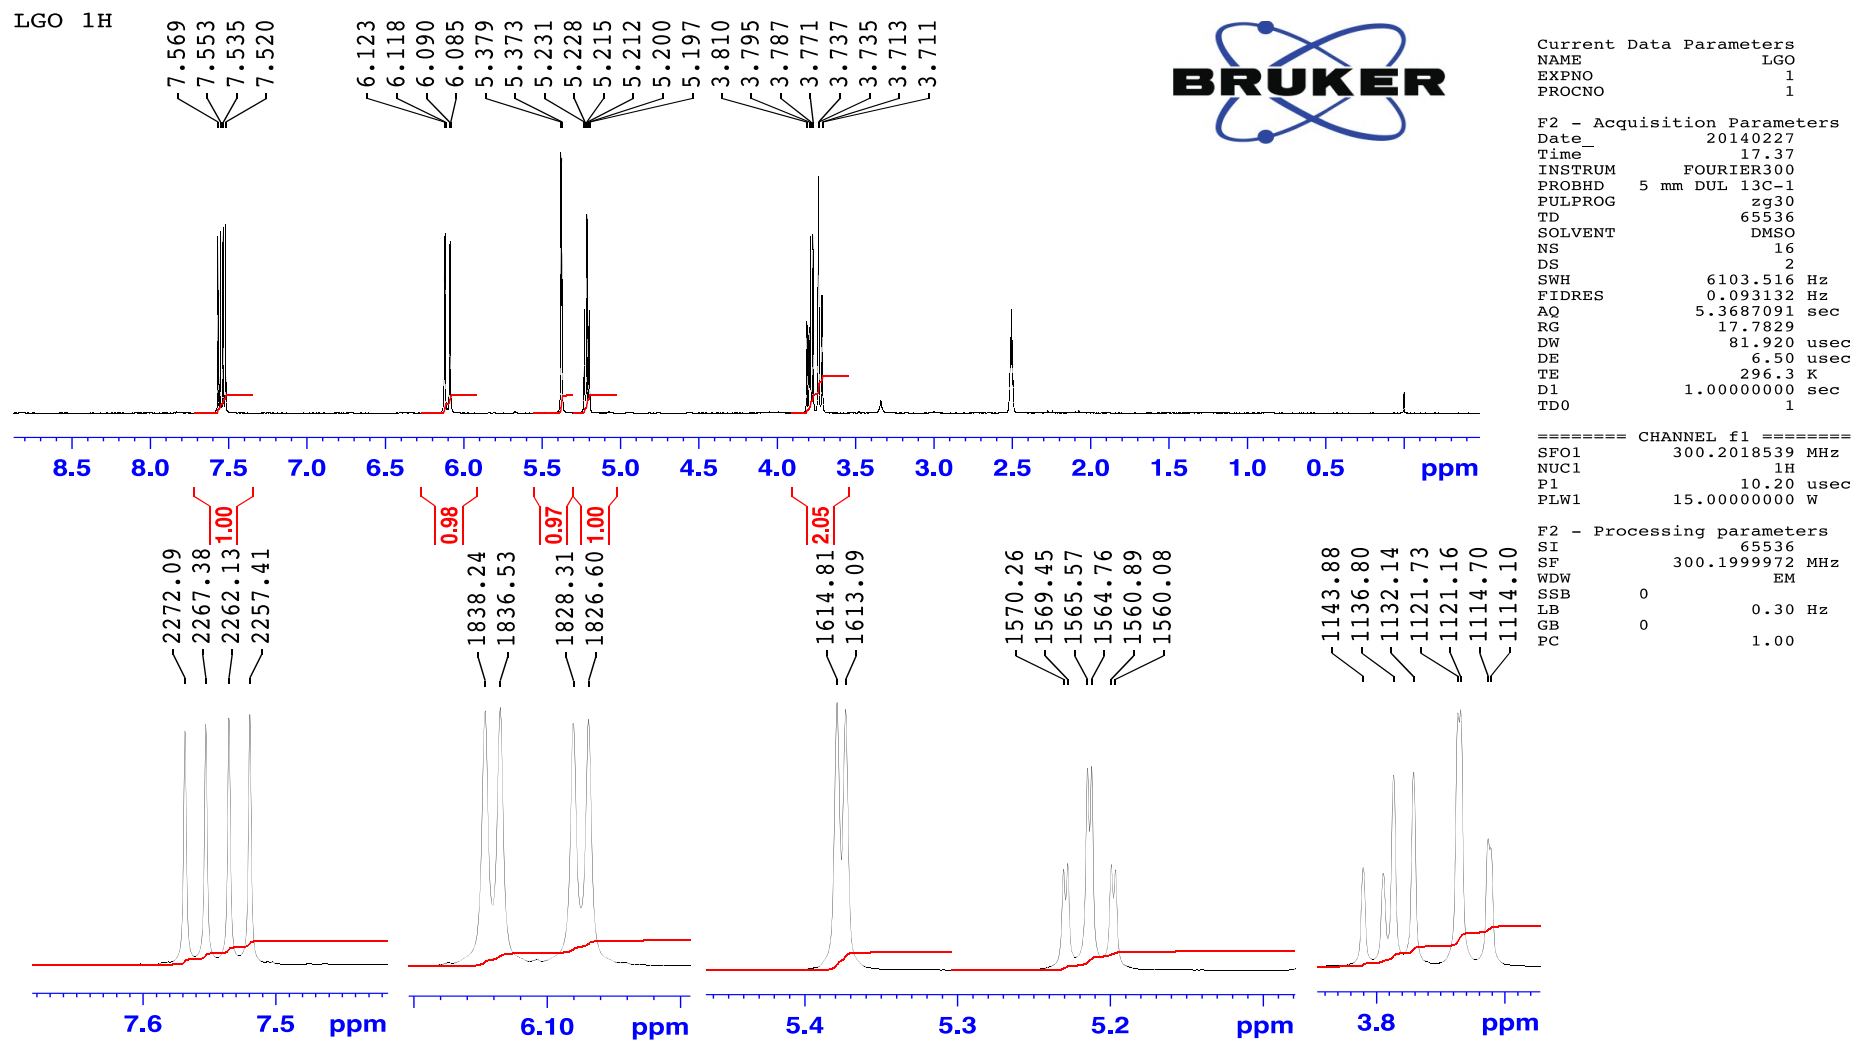



# <sup>13</sup>C NMR spectrum of industrial grade levoglucosenone (LGO)

LGO 13C

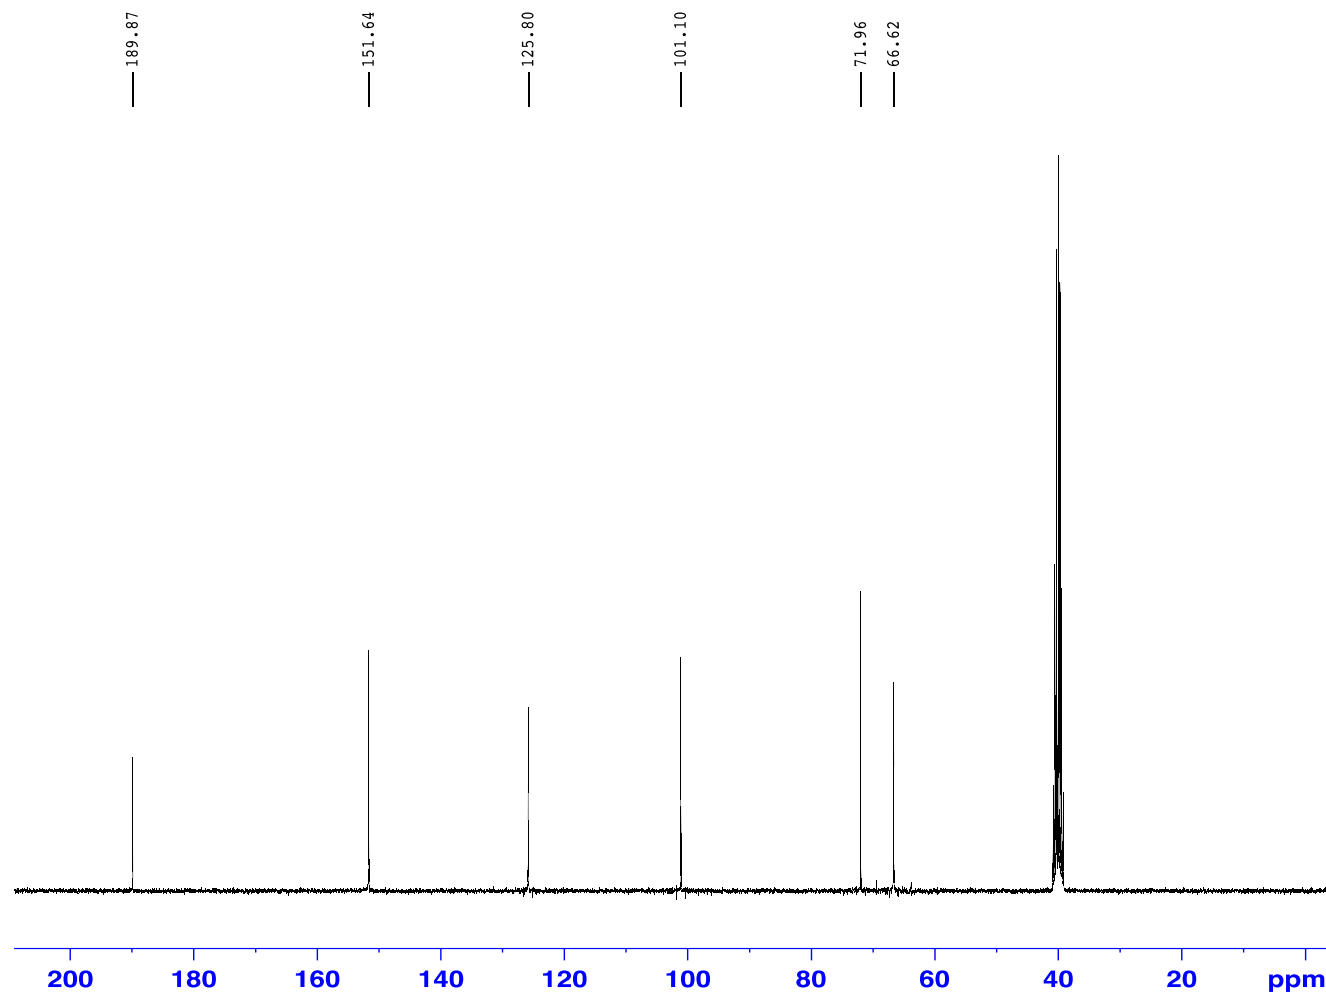

```

Current Data Parameters
NAME          LGO
EXPNO         2
PROCNO        1

F2 - Acquisition Parameters
Date_         20140227
Time          17.40
INSTRUM       FOURIER300
PROBHD        5 mm DUL 13C-1
PULPROG       zgpg30
TD            65536
SOLVENT       DMSO
NS            2048
DS            4
SWH           24414.063 Hz
FIDRES        0.372529 Hz
AQ            1.3421773 sec
RG            501.187
DW            20.480 usec
DE            6.50 usec
TE            296.4 K
D1            2.00000000 sec
D11           0.03000000 sec
D31           0.00001300 sec
D40           0.00439029 sec
L4            37
L5            53
P32           98.00 usec
TD0           1

===== CHANNEL f1 =====
SFO1          75.4928982 MHz
NUC1           13C
P1            13.00 usec
PLW1          22.00000000 W

===== CHANNEL f2 =====
SFO2          300.2012008 MHz
NUC2           1H
CPDPRG[2]     waltz16
PCPD2         98.00 usec
PLW2          15.00000000 W
PLW12         0.17219000 W
PLW13         0.17219000 W

F2 - Processing parameters
SI            32768
SF            75.4853500 MHz
WDW           EM
SSB           0
LB            1.00 Hz
GB            0
PC            1.40
    
```

## FT-IR spectrum of (*S*)- $\gamma$ -hydroxymethyl- $\alpha,\beta$ -butenolide (HBO)

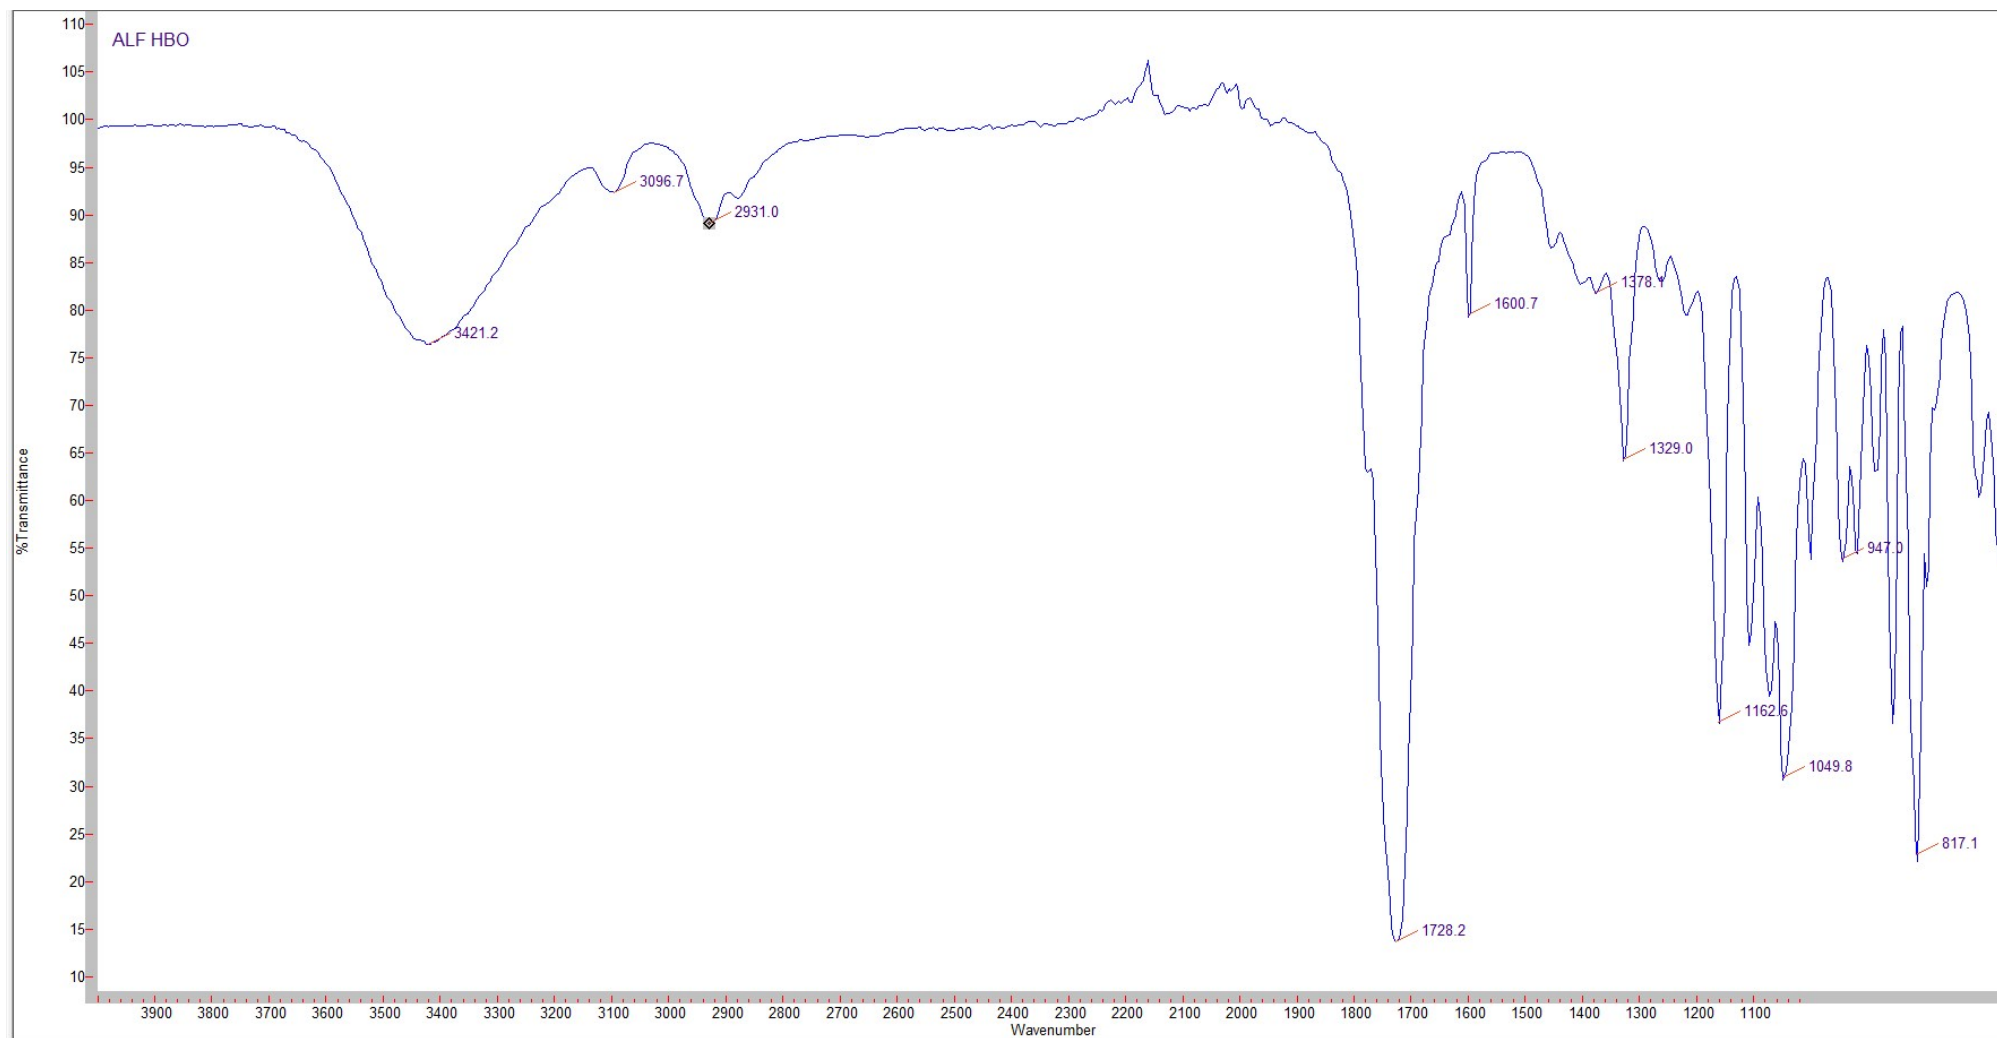

# <sup>1</sup>H NMR spectrum of (*S*)- $\gamma$ -hydroxymethyl- $\alpha,\beta$ -butenolide (HBO)

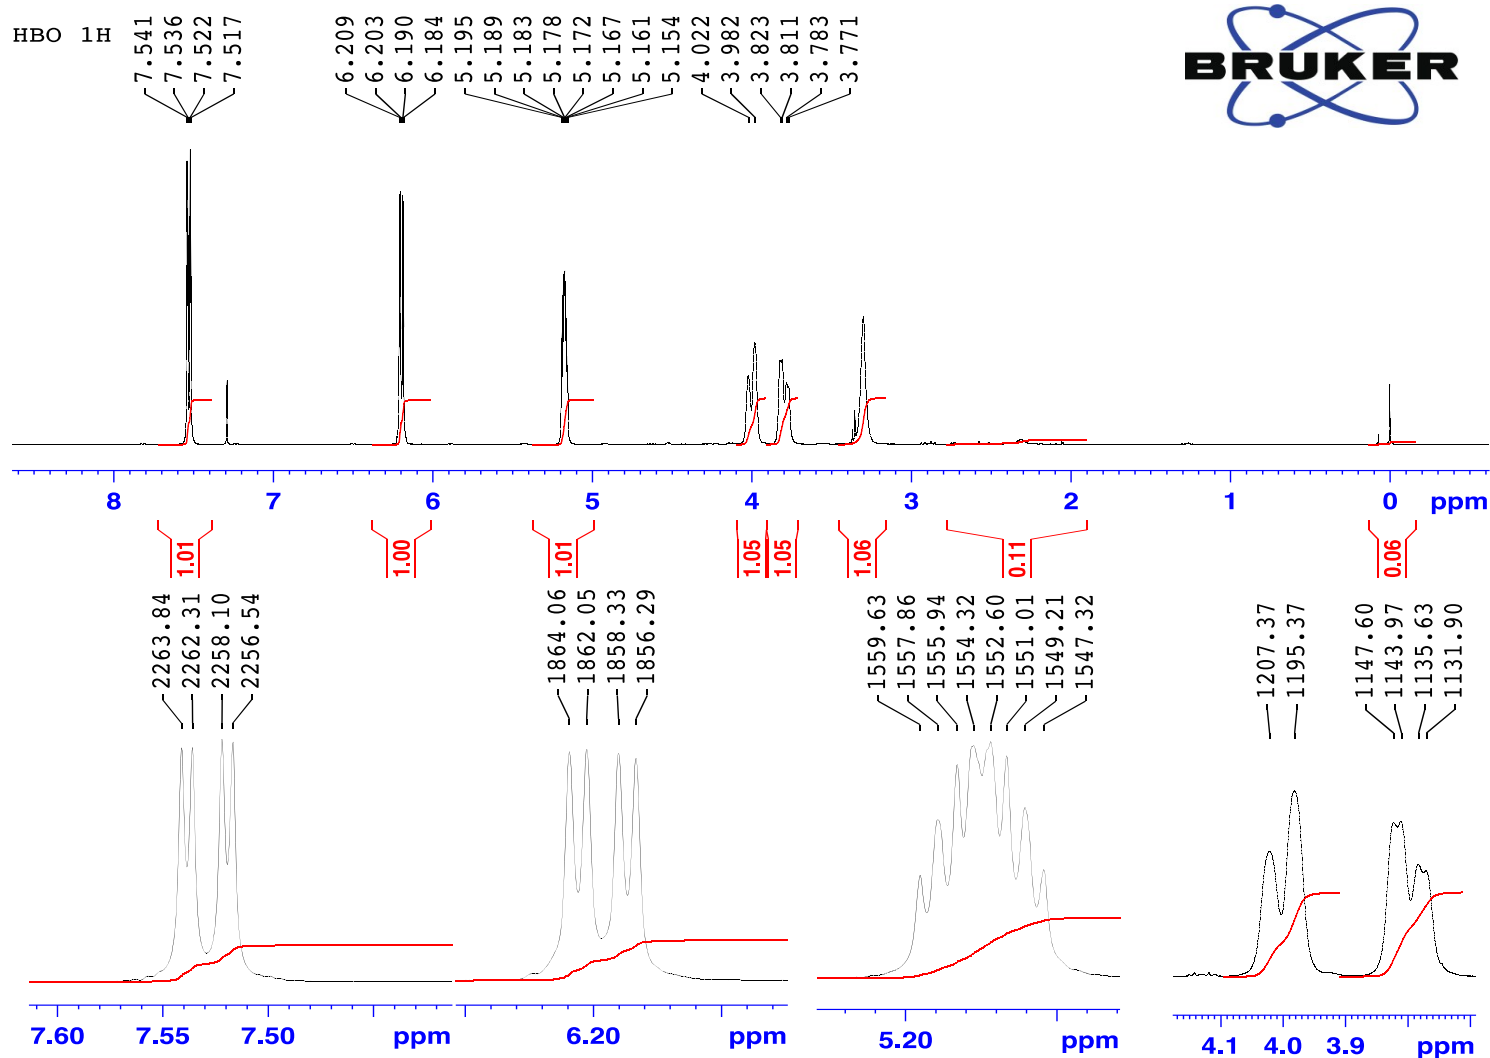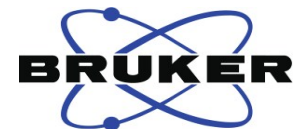

Current Data Parameters  
 NAME APE-HBO-P-1H  
 EXPNO 1  
 PROCNO 1

F2 - Acquisition Parameters  
 Date\_ 20140417  
 Time 14.33  
 INSTRUM FOURIER300  
 PROBHD 5 mm DUL 13C-1  
 PULPROG zg30  
 TD 65536  
 SOLVENT CDCl3  
 NS 16  
 DS 2  
 SWH 6103.516 Hz  
 FIDRES 0.093132 Hz  
 AQ 5.3687091 sec  
 RG 20.0457  
 DW 81.920 usec  
 DE 6.50 usec  
 TE 297.2 K  
 D1 1.00000000 sec  
 TD0 1

===== CHANNEL f1 =====  
 SFO1 300.2018539 MHz  
 NUC1 1H  
 P1 10.20 usec  
 PLW1 15.00000000 W

F2 - Processing parameters  
 SI 65536  
 SF 300.1999945 MHz  
 WDW EM  
 SSB 0  
 LB 0.30 Hz  
 GB 0  
 PC 1.00

# <sup>13</sup>C NMR spectrum of (*S*)- $\gamma$ -hydroxymethyl- $\alpha,\beta$ -butenolide (HBO)

HBO 13C

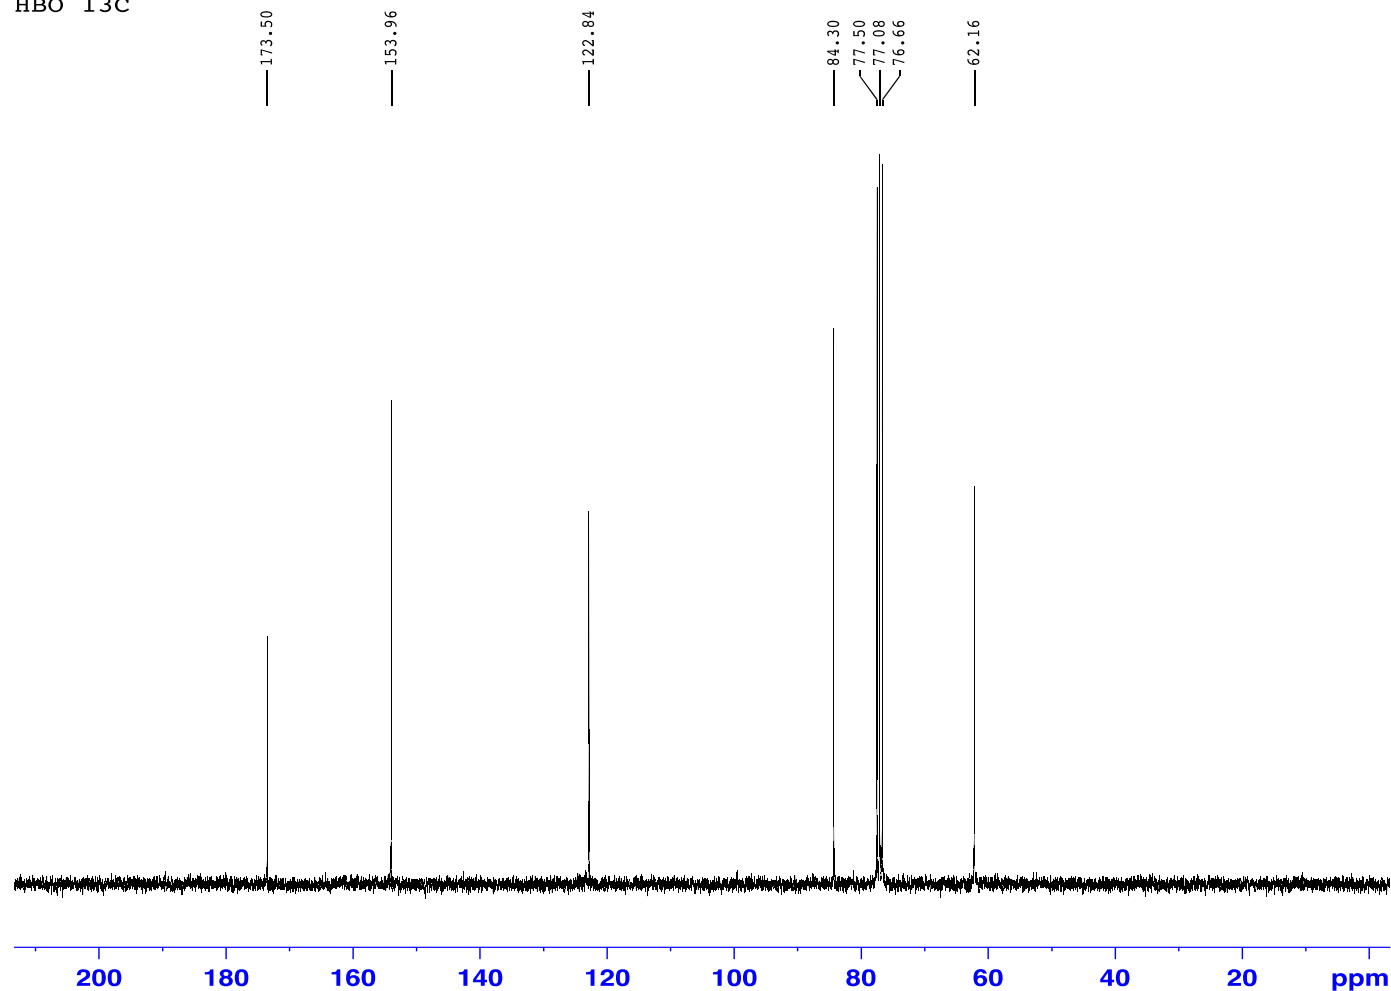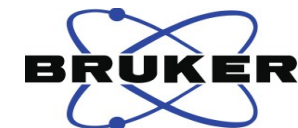

Current Data Parameters  
NAME APE-HBO-P-13C  
EXPNO 1  
PROCNO 1

F2 - Acquisition Parameters  
Date\_ 20140417  
Time 14.36  
INSTRUM FOURIER300  
PROBHD 5 mm DUL 13C-1  
PULPROG zgpg30  
TD 65536  
SOLVENT CDCl3  
NS 512  
DS 4  
SWH 24414.063 Hz  
FIDRES 0.372529 Hz  
AQ 1.3421773 sec  
RG 501.187  
DW 20.480 usec  
DE 6.50 usec  
TE 297.3 K  
D1 2.00000000 sec  
D11 0.03000000 sec  
D31 0.00001300 sec  
D40 0.00439029 sec  
L4 37  
L5 53  
P32 98.00 usec  
TD0 1

===== CHANNEL f1 =====  
SFO1 75.4928982 MHz  
NUC1 13C  
P1 13.00 usec  
PLW1 22.00000000 W

===== CHANNEL f2 =====  
SFO2 300.2012008 MHz  
NUC2 1H  
CPDPRG[2] waltz16  
PCPD2 98.00 usec  
PLW2 15.00000000 W  
PLW12 0.17219000 W  
PLW13 0.17219000 W

F2 - Processing parameters  
SI 32768  
SF 75.4853500 MHz  
WDW EM  
SSB 0  
LB 1.00 Hz  
GB 0  
PC 1.40

## FT-IR spectrum of 2,3-dehydro levoglucosenone (2H-LGO)

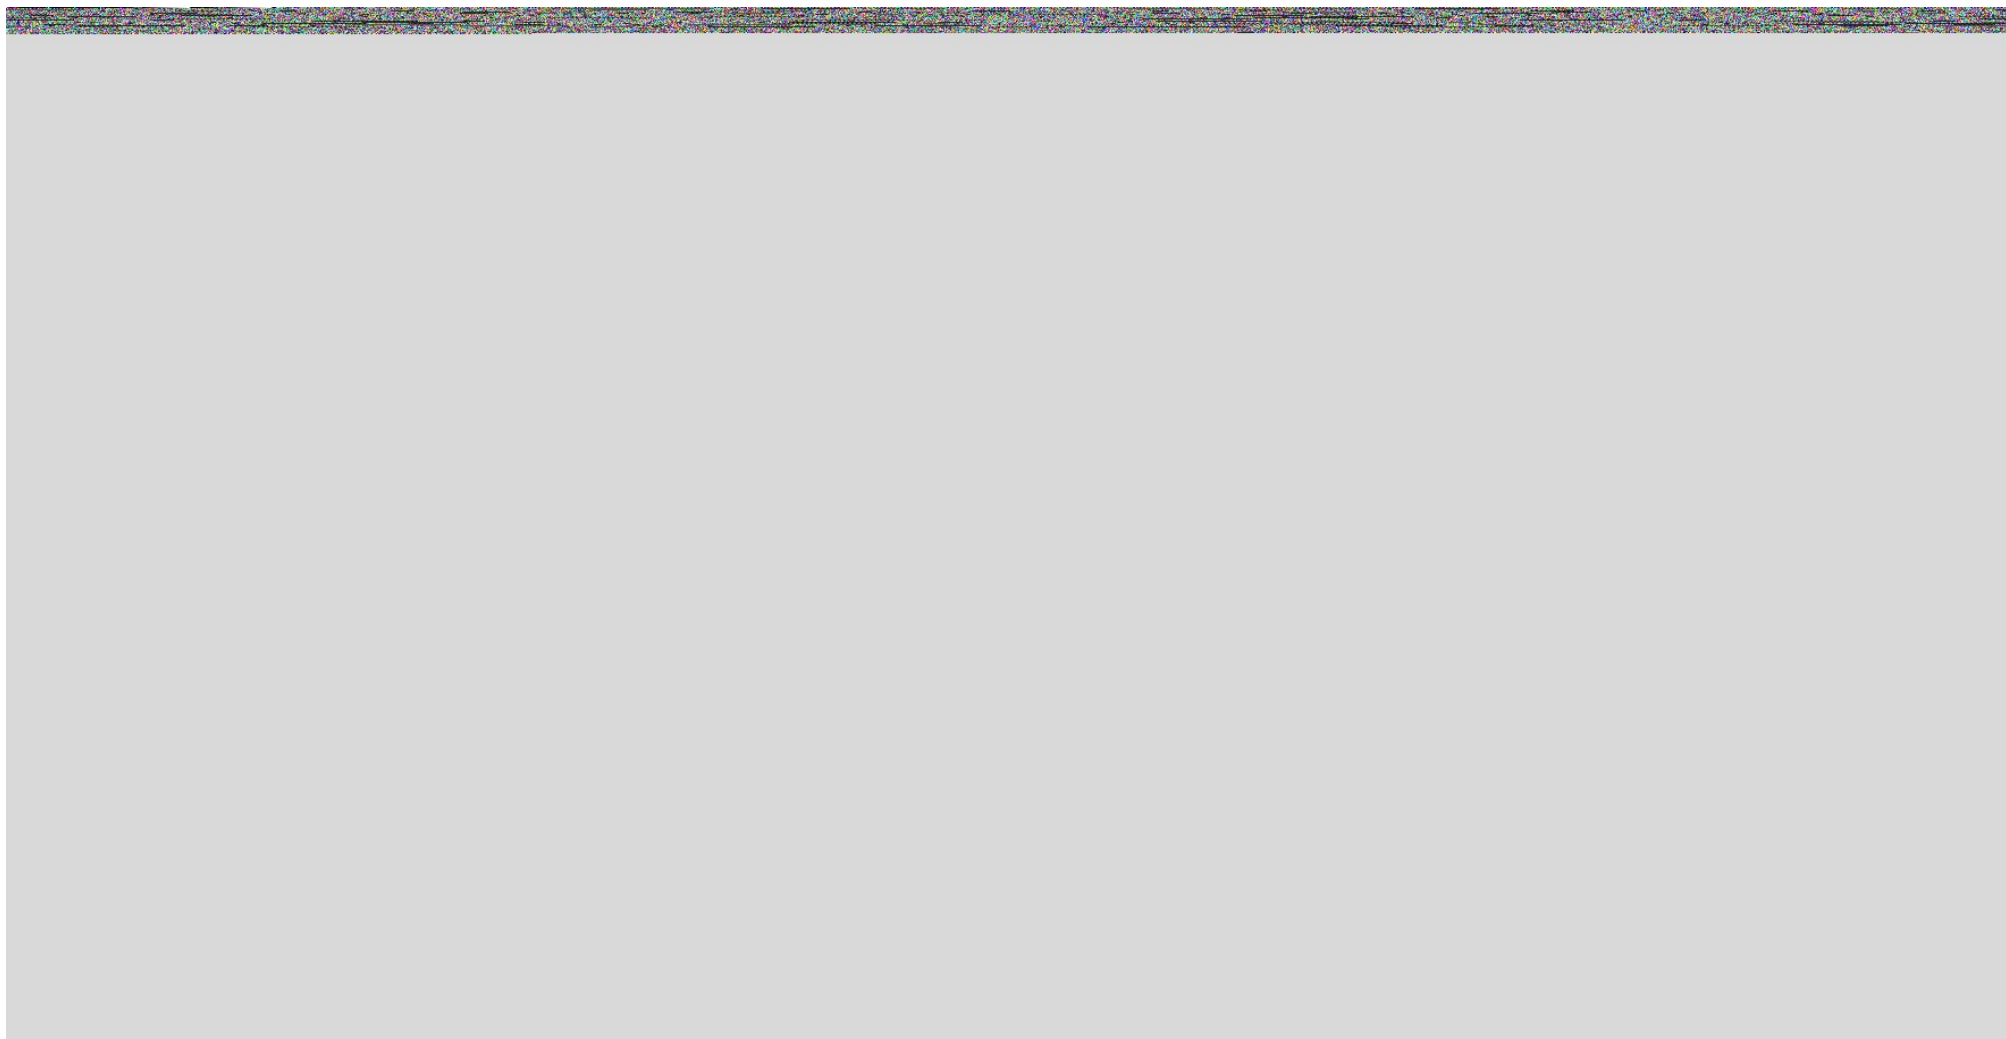

# <sup>1</sup>H NMR spectrum of 2,3-dehydro levoglucosenone (2H-LGO)

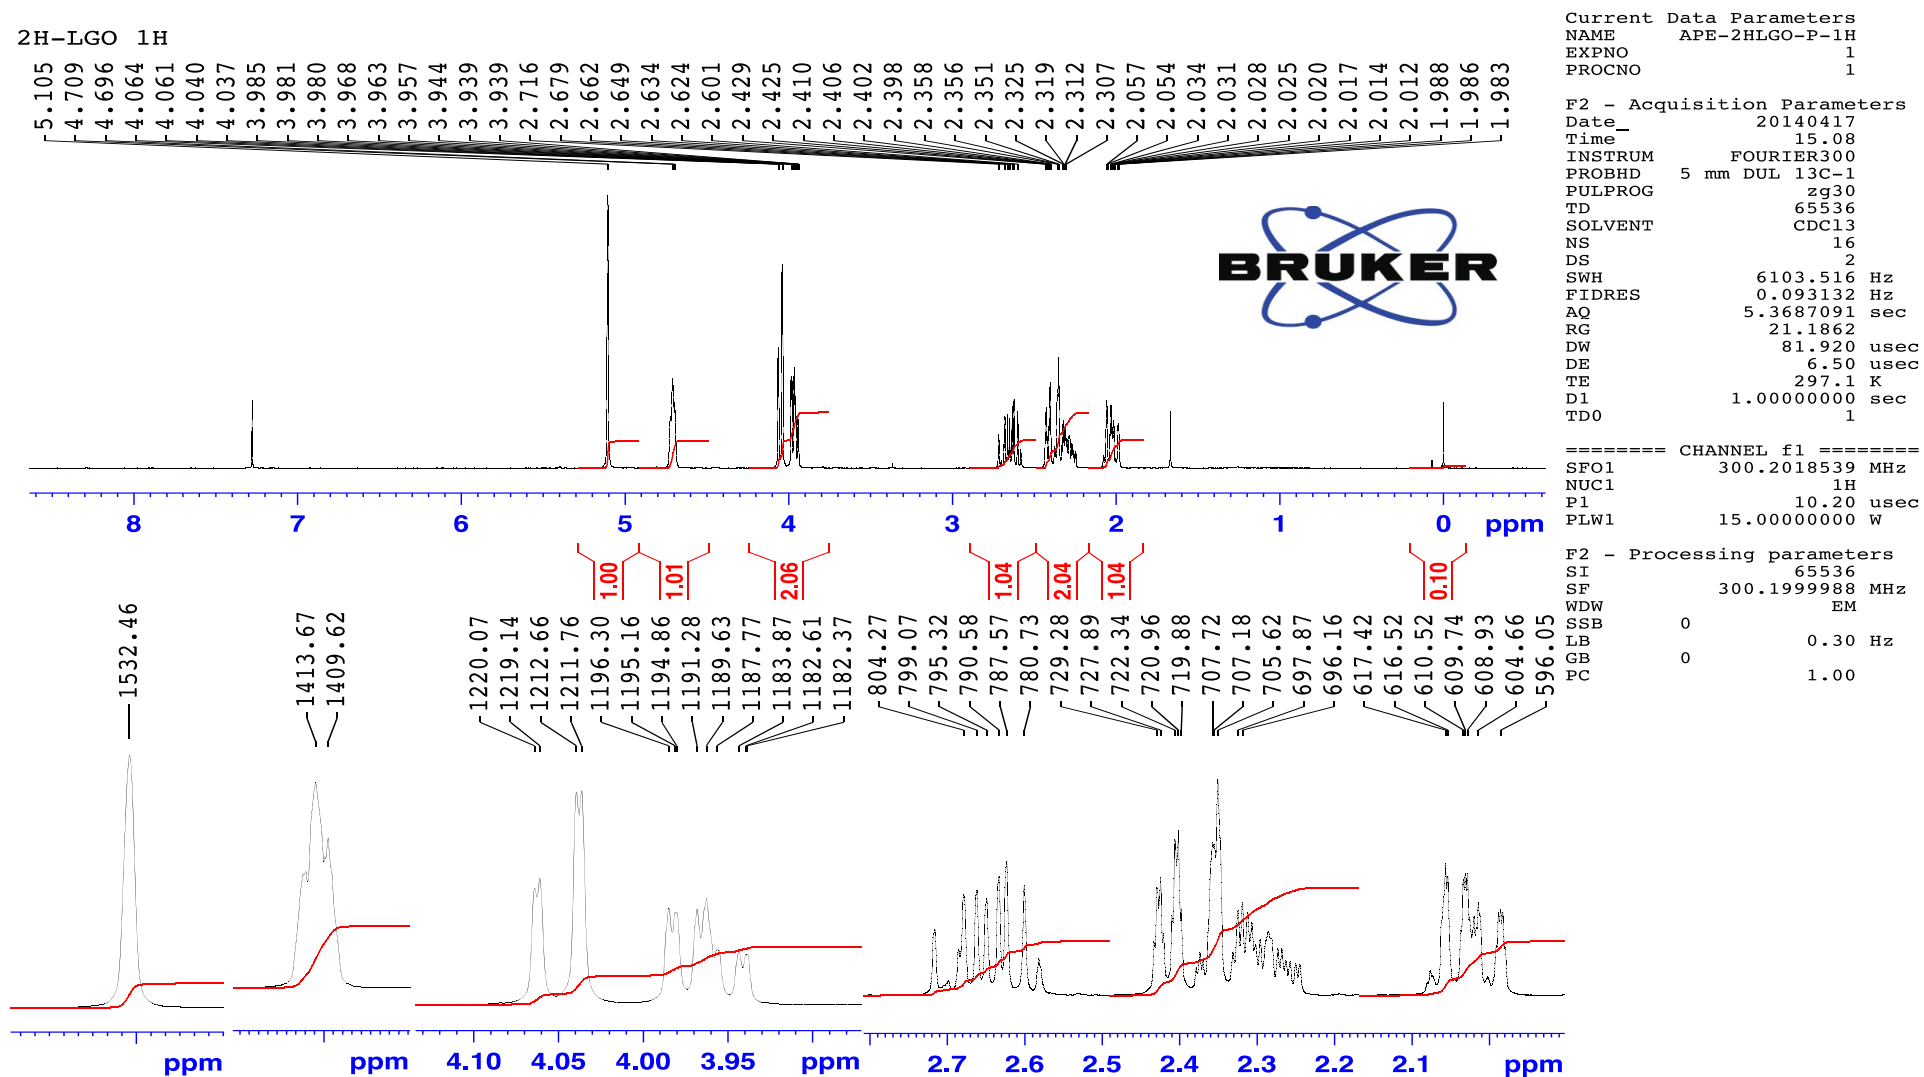

# <sup>13</sup>C NMR spectrum of 2,3-dehydro levoglucosenone (2H-LGO)

2H-LGO 13C

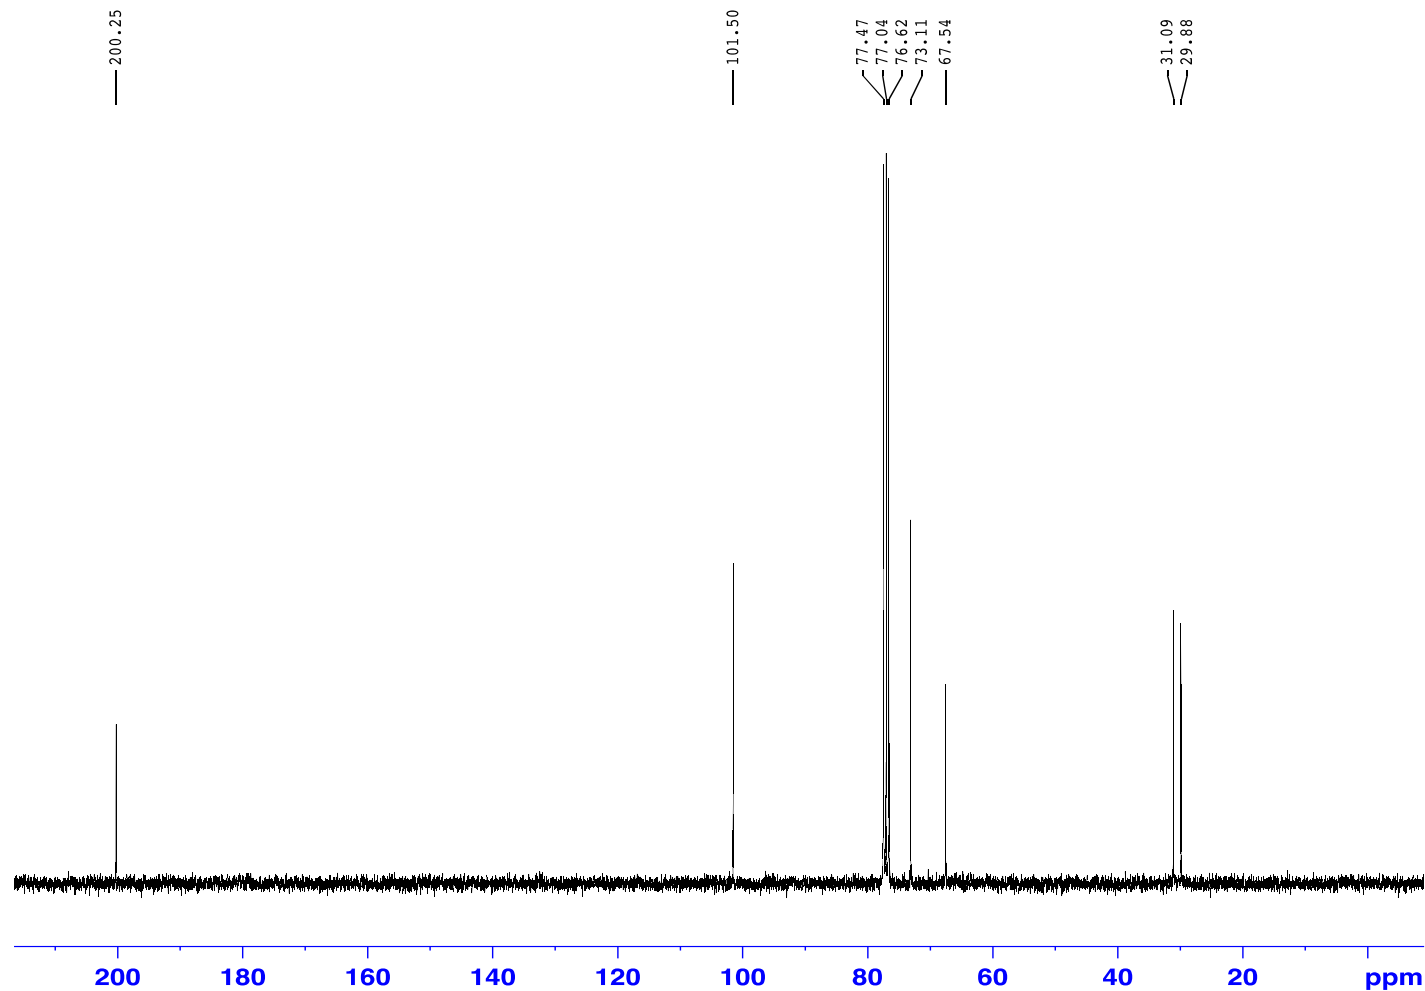

Current Data Parameters  
 NAME APE-2HLGO-P-13C  
 EXPNO 10  
 PROCNO 1

F2 - Acquisition Parameters  
 Date\_ 20140417  
 Time 15.11  
 INSTRUM FOURIER300  
 PROBHD 5 mm DUL 13C-1  
 PULPROG zgpg30  
 TD 65536  
 SOLVENT CDCl3  
 NS 512  
 DS 4  
 SWH 24414.063 Hz  
 FIDRES 0.372529 Hz  
 AQ 1.3421773 sec  
 RG 501.187  
 DW 20.480 usec  
 DE 6.50 usec  
 TE 297.1 K  
 D1 2.00000000 sec  
 D11 0.03000000 sec  
 D31 0.00001300 sec  
 D40 0.00439029 sec  
 L4 37  
 L5 53  
 P32 98.00 usec  
 TD0 1

===== CHANNEL f1 =====  
 SFO1 75.4928982 MHz  
 NUC1 13C  
 P1 13.00 usec  
 PLW1 22.00000000 W

===== CHANNEL f2 =====  
 SFO2 300.2012008 MHz  
 NUC2 1H  
 CPDPRG[2] waltz16  
 PCPD2 98.00 usec  
 PLW2 15.00000000 W  
 PLW12 0.17219000 W  
 PLW13 0.17219000 W

F2 - Processing parameters  
 SI 32768  
 SF 75.4853500 MHz  
 WDW EM  
 SSB 0  
 LB 1.00 Hz  
 GB 0  
 PC 1.40

FT-IR spectrum of (*S*)- $\gamma$ -hydroxymethyl- $\gamma$ -butyrolactone (2H-HBO)

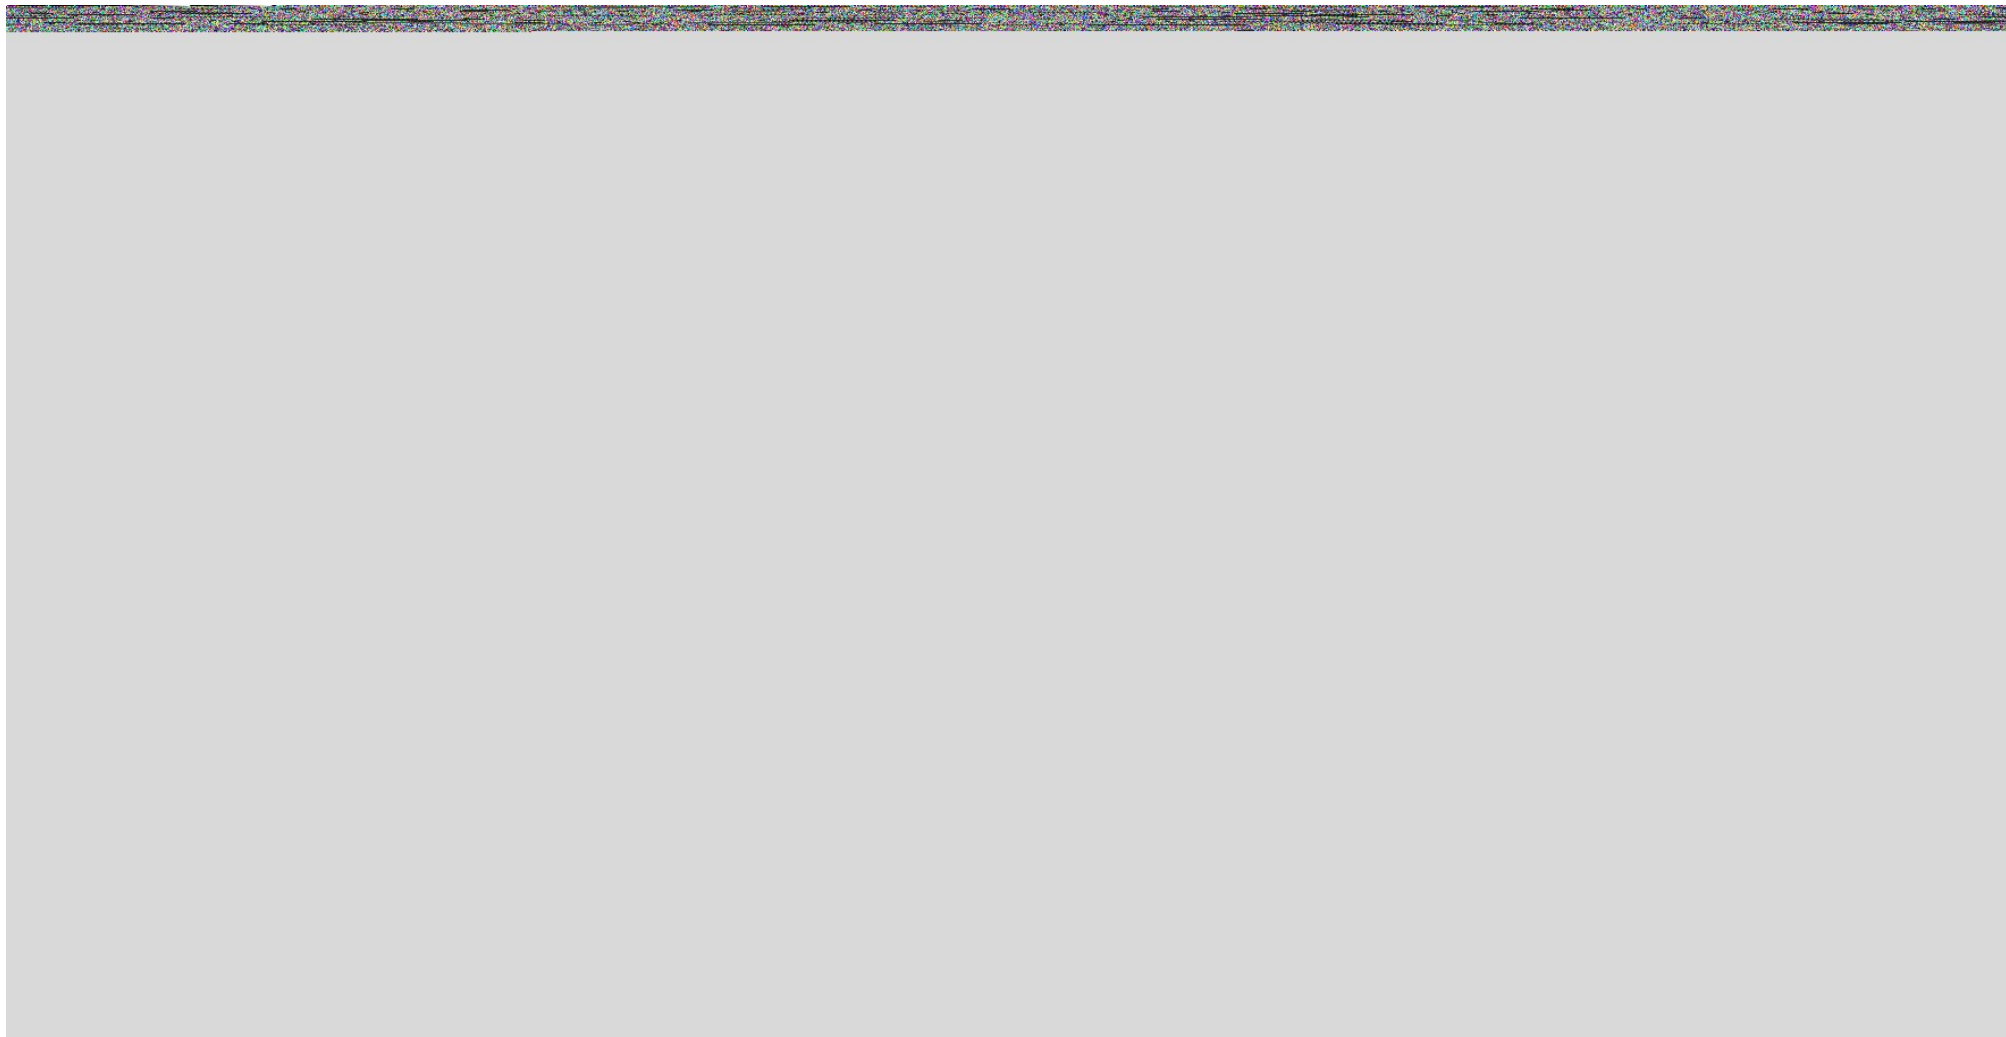



# <sup>1</sup>H NMR spectrum of (*S*)-γ-hydroxymethyl-γ-butyrolactone (2H-HBO)

2H-HBO 1H

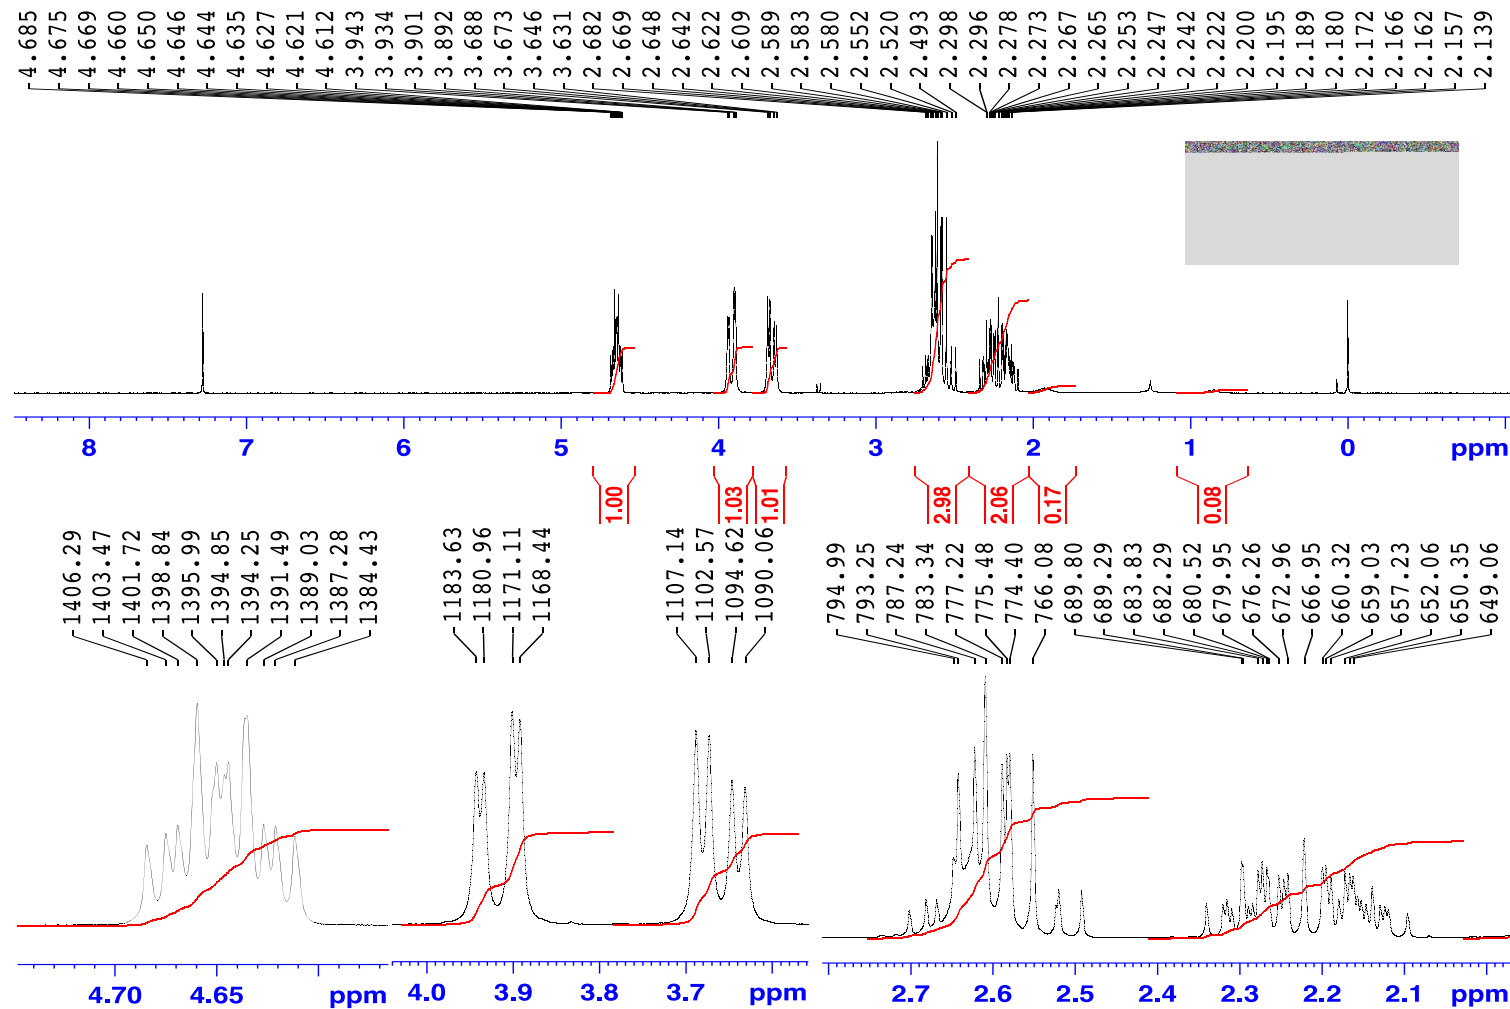

Current Data Parameters  
NAME APE-2HHBO-P-1H  
EXPNO 1  
PROCNO 1

F2 - Acquisition Parameters  
Date\_ 20140418  
Time 11.18  
INSTRUM FOURIER300  
PROBHD 5 mm DUL 13C-1  
PULPROG zg30  
TD 65536  
SOLVENT CDCl3  
NS 16  
DS 2  
SWH 6103.516 Hz  
FIDRES 0.093132 Hz  
AQ 5.3687091 sec  
RG 25.1803  
DW 81.920 usec  
DE 6.50 usec  
TE 294.6 K  
D1 1.00000000 sec  
TD0 1

==== CHANNEL f1 =====  
SFO1 300.2018539 MHz  
NUC1 1H  
P1 10.20 usec  
PLW1 15.00000000 W

F2 - Processing parameters  
SI 65536  
SF 300.1999986 MHz  
WDW EM  
SSB 0  
LB 0.30 Hz  
GB 0  
PC 1.00

# <sup>13</sup>C NMR spectrum of (*S*)- $\gamma$ -hydroxymethyl- $\gamma$ -butyrolactone (2H-HBO)

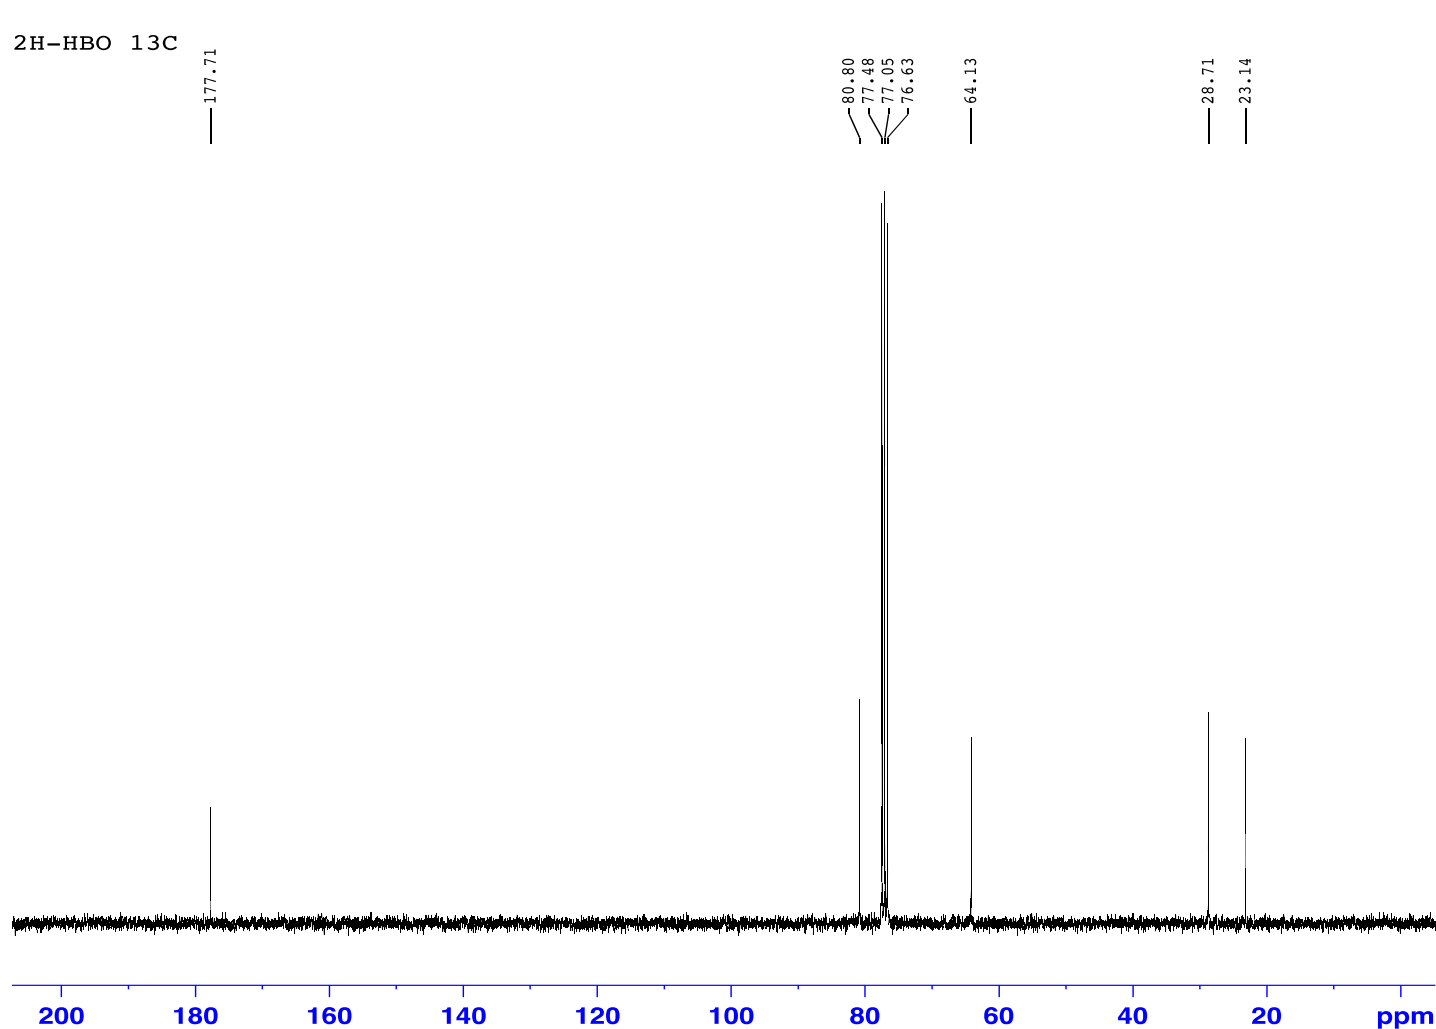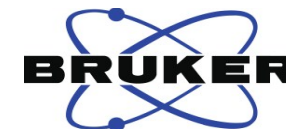

Current Data Parameters  
NAME APE-2HHBO-P-13C  
EXPNO 2  
PROCNO 1

F2 - Acquisition Parameters  
Date\_ 20140418  
Time 11.21  
INSTRUM FOURIER300  
PROBHD 5 mm DUL 13C-1  
PULPROG zgpg30  
TD 65536  
SOLVENT CDCl3  
NS 512  
DS 4  
SWH 24414.063 Hz  
FIDRES 0.372529 Hz  
AQ 1.3421773 sec  
RG 501.187  
DW 20.480 usec  
DE 6.50 usec  
TE 294.6 K  
D1 2.00000000 sec  
D11 0.03000000 sec  
D31 0.00001300 sec  
D40 0.00439029 sec  
L4 37  
L5 53  
P32 98.00 usec  
TD0 1

===== CHANNEL f1 =====  
SFO1 75.4928982 MHz  
NUC1 13C  
P1 13.00 usec  
PLW1 22.00000000 W

===== CHANNEL f2 =====  
SFO2 300.2012008 MHz  
NUC2 1H  
CPDPRG[2] waltz16  
PCPD2 98.00 usec  
PLW2 15.00000000 W  
PLW12 0.17219000 W  
PLW13 0.17219000 W

F2 - Processing parameters  
SI 32768  
SF 75.4853500 MHz  
WDW EM  
SSB 0  
LB 1.00 Hz  
GB 0  
PC 1.40
